# Supplementary material for: Amino Acid Fingerprinting of Authentic Nonfat Dry Milk and Skim Milk Powder and Effects of Spiking with Selected Potential Adulterants
Source: MDPI journal article supplement (doi:10.3390/foods11182868), 2022-09-16
Supplement: s1 [file s1]

## Supplementary Materials

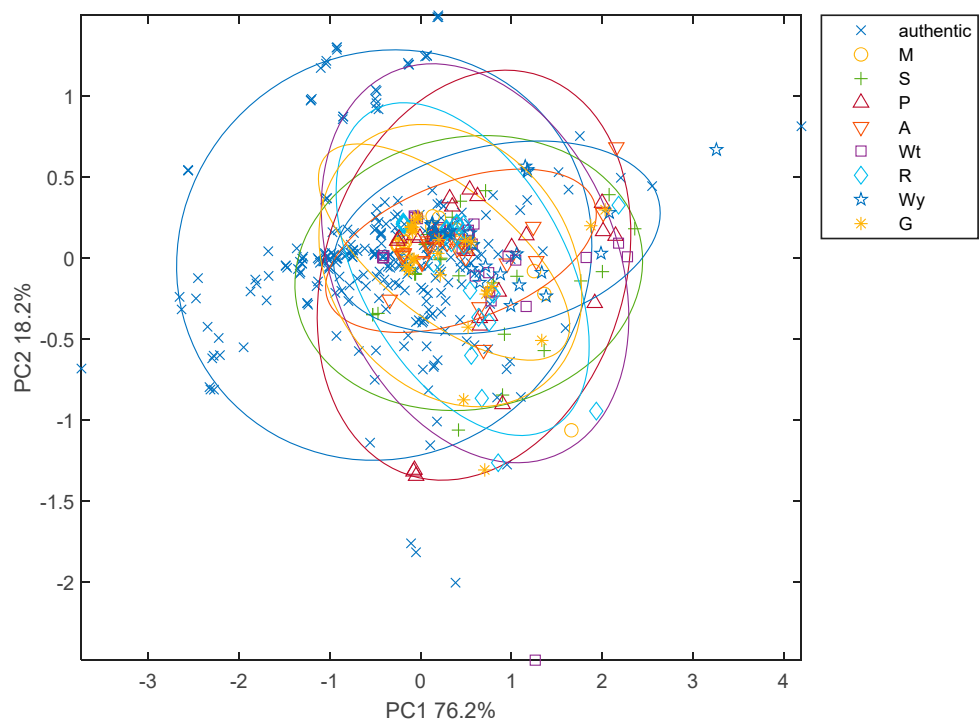

**Figure S1.** Principal component scores plot of authentic and adulterated samples. The data were directly used without further pre-treatments. Each class was surrounded with its own confidence ellipses ( $p < 0.05$ ).

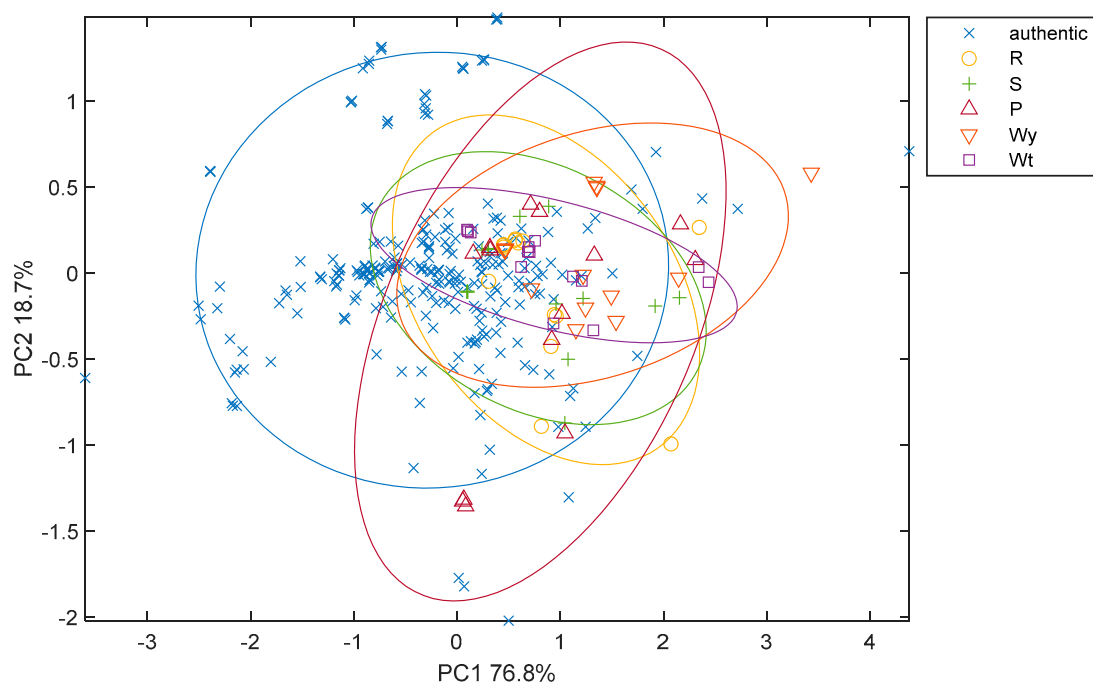

**Figure S2.** Principal component scores plot of authentic and selected adulterated samples with spiking levels > 1%. The data were directly used without further pretreatments. Each class was surrounded with its own confidence ellipses ( $p < 0.05$ ).
